1 **Reduced Suprathreshold Auditory Nerve Responses are Associated with**  
2 **Thinner Temporal Cortex and Slower Processing Speed in Presbycusis**

3 Paul H. Delano\*<sup>1,2,3,4</sup>, Chama Belkhiria<sup>2</sup>, Rodrigo C. Vergara<sup>2,4</sup>, Melissa Martínez<sup>5</sup>, Alexis Leiva<sup>2</sup>,  
4 Maricarmen Andrade<sup>6</sup>, Bruno Marcenaro<sup>2</sup>, Mariela Torrente<sup>1</sup>, Juan Cristóbal Maass<sup>1</sup> and Carolina Delgado<sup>2,5</sup>

5

- 6 1. Otolaryngology Department, Clinical Hospital of the University of Chile, 8380456, Santiago, Chile.  
7 2. Neuroscience Department, Faculty of Medicine, University of Chile, 8380453, Santiago, Chile.  
8 3. Centro Avanzado de Ingeniería Eléctrica y Electrónica, AC3E, Universidad Técnica Federico Santa  
9 María, 2390212, Valparaíso, Chile.  
10 4. Biomedical Neuroscience Institute, BNI, Facultad de Medicina, Universidad de Chile, 8380453,  
11 Santiago, Chile.  
12 5. Neurology and Neurosurgery Department, Clinical Hospital of the University of Chile, 8380456,  
13 Santiago, Chile.  
14 6. Departamento de Geriátrica, Clínica Universidad de los Andes, 7620157, Santiago, Chile.  
15

16 **Abbreviated title:** Brain and auditory nerve responses in presbycusis

17 **Number of figures:** 4

18 **Number of tables:** 4

19 **Number of words for abstract:** 238

20 **Number of words for introduction:** 402

21 **Number of words for discussion:** 1090

22 **Conflict of interest statement**

23 The authors declare no competing financial interests.

24 **Acknowledgments**

25 We thank Professor Luis Robles for his valuable comments. Funded by Proyecto  
26 Fondecyt 1161155 to P.H.D, Proyecto Anillo ACT1403, CONICYT BASAL FB008,  
27 Proyecto ICM P09-015F y Fundación Guillermo Puelma.

28 **\*Correspondence**

29 Dr. Paul H. Delano  
30 phdelano@gmail.com  
31 Santos Dumont, 999  
32 Otolaryngology Department, Universidad de Chile  
33 Santiago, Chile  
34  
35  
36

37 **Abstract**

38 Epidemiological evidence shows an association between hearing loss and dementia  
39 in elderly people. However, the mechanisms that connect hearing impairments and  
40 cognitive decline are still unknown. Here we propose that a suprathreshold auditory-nerve  
41 impairment is associated with cognitive decline and brain atrophy. Methods: audiological,  
42 neuropsychological, and brain structural 3-Tesla MRI data were obtained from elders with  
43 different levels of hearing loss recruited in the ANDES cohort. The amplitude of waves I  
44 (auditory nerve) and V (midbrain) from auditory brainstem responses were measured at 80  
45 dB nHL. We also calculated the ratio between wave V and I as a proxy of a suprathreshold  
46 brainstem function. Results: we included a total of 101 subjects (age:  $73.5 \pm 5.2$  years  
47 (mean  $\pm$  SD), mean education:  $9.5 \pm 4.2$  years, and mean audiogram thresholds (0.5-4  
48 kHz):  $25.5 \pm 12.0$  dB HL). We obtained reliable suprathreshold waves V in all subjects  
49 (n=101), while replicable waves I were obtained in 92 subjects (91.1%). Partial Spearman  
50 correlations (corrected by age, gender, education and hearing thresholds) showed that  
51 reduced suprathreshold wave I responses were associated with thinner bilateral medial and  
52 inferior temporal cortex and, with slower processing speed as evidenced by the Trail-  
53 Making Test-A and digit symbol tests. Non-significant correlations were obtained between  
54 wave I amplitudes and other cognitive domains. Conclusions: These results evidence that  
55 reduced suprathreshold auditory nerve responses in presbycusis are associated with slower  
56 processing speed and brain structural changes in the temporal cortex.

57

58 **Key-words:** auditory brainstem; cognition; presbycusis; elderly; temporal cortex; magnetic  
59 resonance imaging.

60

61

62

63

64

## 65 **Introduction**

66           Epidemiological studies have associated hearing loss with cognitive decline in  
67 adults older than 55 years, showing that individuals with audiometric thresholds worse than  
68 40 dB are more likely to develop dementia [1-4]. However, the mechanisms that connect  
69 this epidemiological association are still under research [5]. Age-related hearing loss or  
70 presbycusis is characterized by bilateral hearing loss, degraded speech understanding, and  
71 impaired music perception, especially in background noise conditions [6,7]. Presbycusis is  
72 also associated with executive dysfunction [8,9] and with brain atrophy in the temporal lobe  
73 [10,11]. Moreover, recent studies in presbycusis have shown cortical atrophy in regions  
74 beyond the auditory cortex, including the cingulate cortex and parietal regions [9,12].

75           In addition to audiogram threshold elevations, hearing impairments in presbycusis  
76 can also be due to an altered suprathreshold function [13]. In rodents, suprathreshold  
77 brainstem responses have been extensively studied in models of acoustic injury, in which  
78 after a transient acoustic trauma, there is a temporary auditory threshold elevation that  
79 recovers completely, but a permanent reduction in the amplitude of auditory nerve  
80 responses is observed at supra-thresholds levels [14,15]. In humans, the reduction of the  
81 amplitude of wave I from auditory brainstem responses (ABR) without alterations in  
82 auditory thresholds and otoacoustic emissions levels has been termed as hidden hearing  
83 loss (HHL) [16]. The underlying structural abnormality found in animals with HHL is the  
84 loss of synapses between inner hair cells and auditory nerve neurons, a histologic feature  
85 that has been termed as cochlear synaptopathy [14,17,18]. Importantly, evidence in animals  
86 shows that cochlear synaptopathy is a contributor of the early pathophysiological process of  
87 presbycusis [19].

88           In humans, the suprathreshold amplitude of ABR wave I has been reported to be  
89 reduced in patients with tinnitus and normal audiograms [16], and in subjects exposed to  
90 noise [20], suggesting that HHL might be part of the pathophysiological mechanisms of  
91 these conditions. In addition, HHL has been proposed as one of the mechanisms that might  
92 degrade speech perception in noisy environments [21]. In this line, a reduction in the  
93 amplitude of suprathreshold auditory nerve responses could be considered as an early stage  
94 of hearing impairment, which can be detected before hearing loss becomes clinically

95 evident. Whether these suprathreshold abnormalities are associated with cognitive  
96 impairment and structural brain changes in humans is unknown. Here, we hypothesize that  
97 a reduction in the amplitude of supra-thresholds auditory-nerve responses (ABR wave I) is  
98 associated with brain atrophy and cognitive decline in the elderly.

99

## 100 **Methods**

### 101 *Subjects*

102 The ANDES (Auditory and Dementia study) project is a prospective cohort of non-  
103 demented Chilean elders ( $\geq 65$  years) with a Mini-Mental State Examination (MMSE)  $> 24$ ,  
104 with different levels of age-related hearing impairment and no previous use of hearing aids.  
105 Inclusion criteria were: preserved functionality measured by the Pfeffer activities  
106 questionnaire [22], auditory brainstem responses evaluated at 80 dB nHL, and magnetic  
107 resonance imaging (MRI) at 3 Tesla. Exclusion criteria for recruitment were: (i) other  
108 causes of hearing loss different from presbycusis; (ii) previous use of hearing aids (iii);  
109 stroke or other neurological disorders; (iv) dementia; and (v) major psychiatric disorders.  
110 All procedures were approved by the Ethics Committee of the Clinical Hospital of the  
111 University of Chile, protocol number: OAIC 752/15. All subjects gave written informed  
112 consent in accordance with the Declaration of Helsinki.

### 113 *Auditory evaluations*

114 Hearing impairments were evaluated with threshold and supra-threshold tests. All  
115 auditory evaluations were assessed inside a sound attenuating room and were obtained by  
116 an experienced audiologist who was blind to cognitive and MRI evaluations. We obtained  
117 audiometric thresholds using a calibrated audiometer (AC40e, Interacoustics®) for each ear  
118 at 0.125, 0.250, 0.5, 1, 2, 3, 4, 6 and 8 kHz. Pure tone averages (PTA) were computed for  
119 each ear using 0.5, 1, 2 and 4 kHz thresholds. The better hearing ear was used for analyses.  
120 Distortion product otoacoustic emissions (DPOAE) ( $2f_1-f_2$ ) were elicited using eight pairs  
121 of primary tones ( $f_1$  and  $f_2$ ) with  $f_2/f_1$  ratio=1.22, and delivered at 65 and 55 dB SPL  
122 (ER10C, Etymotic Research®). DPOAE were measured at eight different frequencies per  
123 ear, between 707 and 3563 Hz. For subsequent analyses we counted the number of detected

124 DPOAE, a value that considering both ears, goes from 0 to 16 (see [9] for more details on  
125 DPOAE analysis). ABR waveforms were averaged with alternating clicks presented at  
126 supra-thresholds levels (2000 repetitions, 80 dB nHL, bandpass 0.1-3 kHz, stimulus rate  
127 21.1 Hz, EP25, Eclipse, Interacoustics®). The amplitudes of waves I and V were measured  
128 from peak to trough, and wave latencies from peaks. For computing wave V/I ratios, in  
129 those cases with no measurable wave I (n=9, see results section), the minimum amplitude  
130 value that we obtained for wave I (0.02  $\mu$ V) was used.

### 131 *Neuropsychological assessment*

132 Subjects and their relatives were evaluated by a neurologist with a complete  
133 structured medical, functional and cognitive interview. Cognitive performance was  
134 assessed by an experienced psychologist in cognitive tests, including the MMSE adapted  
135 for the Chilean population for global cognition [22,23]; the Frontal Assessment Battery  
136 (FAB), perseverative errors from the Wisconsin Card Sorting (WCS) and Trail Making  
137 Test B (TMT-B) for measuring executive function [24]; the Trail Making Test A (TMT-A)  
138 and digit symbol for processing speed [25]; the Boston Nominating Test for Language [26];  
139 the Rey-Osterrieth Complex Figure Test for Visuospatial Abilities [27]; and the free recall  
140 of the Free and Cued Selective Reminding Test (FCSRT) to explore verbal episodic  
141 memory [28,29].

### 142 *Magnetic resonance imaging*

143 Neuroimaging data were acquired by a MAGNETOM Skyra 3-Tesla whole-body  
144 MRI Scanner (Siemens Healthcare GmbH®, Erlangen, Germany) equipped with a head  
145 volume coil. T1-weighted magnetization-prepared rapid gradient echo (T1-MPRAGE) axial  
146 images were collected, and parameters were as follows: time repetition (TR) = 2300 ms,  
147 time echo (TE) = 232 ms, matrix = 256  $\times$  256, flip angle = 8°, 26 slices, and voxel size =  
148 0.94  $\times$  0.94  $\times$  0.9 mm<sup>3</sup>. T2-weighted turbo spin echo (TSE) (4500 TR ms, 92 TE ms) and  
149 fluid attenuated inversion recovery (FLAIR) (8000 TR ms, 94 TE ms, 2500 TI ms) were  
150 also collected to inspect structural abnormalities. A total of 440 images were obtained  
151 during an acquisition time of 30 minutes per subject.

### 152 *Morphometric analyses*

153 To determine the structural brain changes of controls and individuals with  
154 presbycusis, we measured the volume and thickness of bilateral cortical regions. FreeSurfer  
155 (version 6.0, <http://surfer.nmr.mgh.harvard.edu>) was used with a single Linux workstation  
156 using Centos 6.0 for T1-weighted images analysis of individual subjects. The FreeSurfer  
157 processing involved several stages, as follows: volume registration with the Talairach atlas,  
158 bias field correction, initial volumetric labeling, nonlinear alignment to the Talairach space,  
159 and final volume labeling. We used the “recon-all” function to generate automatic  
160 segmentations of cortical and subcortical regions. This command performs regional  
161 segmentation and processes gross regional volume in a conformed space (256×256×256  
162 matrix, with coronal reslicing to 1 mm<sup>3</sup> voxels). The function “recon-all” creates gross  
163 brain volume extents for larger-scale regions (i.e., total number of voxels per region): total  
164 grey and white matter, subcortical grey matter, brain mask volume, and estimated total  
165 intracranial volume.

166 Additionally, we measured the cortical thickness in native space using FreeSurfer  
167 tools. We calculated the cortical thickness of each mesh of vertices by measuring the  
168 distance between the point on one surface and the closest conforming point on the opposite  
169 surface. Then we measured the average of the two values calculated from each side to the  
170 other [30]. Based on the brain regions that have been previously studied in presbycusis  
171 [10,31] our regions of interest (ROI) were bilateral frontal, inferior, middle, superior and  
172 transverse temporal gyri, and parietal cortex. We also included as regions of interest,  
173 cortical areas that have been implicated in the neural networks of degraded speech  
174 comprehension: bilateral anterior cingulate cortex, posterior cingulate cortex (PCC), and  
175 precentral and postcentral gyri [9,11,32].

#### 176 *Data analyses*

177 Possible correlations between cognitive tests and audiological functions were  
178 evaluated by means of partial Spearman associations adjusted by age, educational level,  
179 gender and audiogram thresholds. Gender comparisons were done using Mann-Whitney  
180 tests. Comparisons between subgroups were performed with ANCOVA adjusted by age,  
181 education, audiogram thresholds and gender. This approach was maintained for two group  
182 comparisons, as t-test do not allow covariates. Bonferroni corrections were performed for

183 multiple comparisons when comparing more than two groups. Data are shown as mean  $\pm$   
184 standard deviation. Significant differences and correlations were considered for  $p < 0.05$ .

## 185 **Results**

### 186 *Demographic and audiological variables*

187 The mean age of the 101 studied subjects was  $73.5 \pm 5.2$  years with a mean  
188 education of  $9.5 \pm 4.2$  years, and mean PTA of the better hearing ear of  $25.5 \pm 12.0$  dB HL.  
189 A demographic description of the 101 subjects that completed the auditory,  
190 neuropsychological, and MRI evaluations is presented in Table 1. As one of our  
191 recruitment criteria was that subjects were not using hearing aids, the majority of the  
192 enrolled individuals had normal hearing thresholds (PTA  $< 25$  dB HL,  $n=55$ , 54.5%), while  
193 46 subjects had some degree of hearing loss, including 33 (32.7%) with mild hearing loss  
194 (PTA  $\geq 25$  dB HL  $< 40$  dB HL), and 13 individuals (12.8%) with moderate hearing loss  
195 (PTA  $\geq 40$  dB HL) according to audiogram thresholds of the better hearing ear. Age and  
196 audiogram thresholds were significantly correlated (Spearman,  $\rho=0.326$ ,  $p=0.001$ ), while  
197 the educational level was not correlated with PTA thresholds (Spearman,  $\rho=0.0622$ ,  
198  $p=0.536$ ) (Figure 1A, D).

199 Regarding supra-threshold ABR responses, we obtained measurable waves V at 80  
200 dB nHL in the 101 subjects of this study, while wave I was obtained in 92 of these subjects  
201 (91.1%). The average amplitudes of wave I and V were  $0.120 \pm 0.070$   $\mu\text{V}$  and  $0.369 \pm$   
202  $0.129$   $\mu\text{V}$  respectively, while mean latencies were  $5.71 \pm 0.39$  ms for wave V and  $1.56 \pm$   
203  $0.14$  ms for wave I. We found a significant correlation between the amplitude of wave I and  
204 wave V (Figure 2A,  $\rho=0.323$ ,  $p=0.001$ ), while there were no correlations between the  
205 supra-threshold amplitudes of ABR waves I and V and age and audiogram thresholds  
206 (Figure 1B, C, E, F). In addition, there were non-significant differences in the amplitude of  
207 wave I when comparing subjects with hearing loss ( $n=46$ ,  $0.113 \pm 0.79$   $\mu\text{V}$ ) with those with  
208 normal audiogram thresholds ( $n=55$ ,  $0.124 \pm 0.62$   $\mu\text{V}$ ,  $F(1,96)=0.82$ ,  $p=0.775$ , ANCOVA  
209 controlled for age, education and gender). Regarding suprathreshold wave V amplitudes,  
210 we also obtained non-significant effects when comparing control and hearing loss subjects

211 (controls:  $n=55$ ,  $0.394 \pm 0.134 \mu\text{V}$ ; hearing loss;  $n=46$ ,  $0.340 \pm 0.118 \mu\text{V}$ ,  $F(1,96)=3.82$ ,  $p=$   
212  $0.054$ , ANCOVA controlled for age, education and gender).

213 We also calculated the ratio between waves V and I which has been used as a  
214 measure of hidden hearing loss in previous studies [16,19]. The average wave V/I ratio was  
215  $4.5 \pm 3.9$  (interquartile range 2.24 - 5.21). There was an asymmetric distribution of the  
216 wave V/I ratio as a function of wave I amplitude, denoting that wave V/I ratios for wave I  
217 amplitudes below  $0.15 \mu\text{V}$  were significantly larger than for those above  $0.15 \mu\text{V}$  (Mann-  
218 Whitney,  $p<0.001$ ) (Figure 2B, Table 2). Non-significant correlations were obtained  
219 between age and audiogram thresholds with the wave V/I ratio (not shown). In addition,  
220 there were non-significant differences in the wave V/I ratio when comparing subjects with  
221 hearing loss ( $n=46$ ,  $4.7 \pm 4.2$ ) with those with normal audiogram thresholds ( $n=55$ ,  $4.4 \pm$   
222  $3.7$ ,  $F(1,96)=0.42$ ,  $p=0.519$ , ANCOVA controlled for age, education and gender).

223 As the increased wave V/I ratio might be reflecting a compensatory midbrain gain  
224 increase of wave V responses in the group with wave I  $< 0.15 \mu\text{V}$ , we divided data  
225 according to the amplitude of wave I into two groups: (i) those with wave I responses  
226 smaller than  $0.15 \mu\text{V}$  ( $n=68$ ) and (ii) those with wave I responses larger than  $0.15 \mu\text{V}$   
227 ( $n=33$ ). Table 2 shows demographic, audiological and neuropsychological data comparing  
228 these two groups with different wave I amplitudes. There were no differences in age,  
229 education and hearing thresholds (assessed by audiogram and DPOAEs) between these two  
230 groups.

### 231 *Suprathreshold ABRs and cognitive assessments*

232 Regarding cognitive tests, and after adjusting by age, education, gender, audiogram  
233 thresholds, and Bonferroni correction for multiple comparisons (10 cognitive tests), the  
234 only significant difference was obtained in the TMT-A speed, showing that the group with  
235 smaller wave I responses had slower processing speed ( $66.3 \pm 31.5$  s) than the group with  
236 larger wave I responses ( $51.9 \pm 23.0$  s,  $p=0.005$ ).

237 Next, we performed partial Spearman correlations in the whole sample ( $n=101$ )  
238 between ABR and cognitive tests, corrected by age, education, gender and audiogram  
239 thresholds. The only cognitive tests that showed significant correlations with the amplitude



240 of supra-threshold wave I were those that measure processing speed: the TMT-A time  
241 (Figure 3,  $\rho = -0.27$ ,  $p = 0.007$ ), and the digit symbol ( $\rho = 0.199$ ;  $p = 0.049$ ), while Boston  
242 performance was inversely correlated with the latency of wave V ( $\rho = -0.208$ ;  $p = 0.039$ )  
243 (Table 3).

#### 244 *Suprathreshold ABRs and cortical volume and thickness*

245 We performed partial Spearman correlations between the suprathreshold amplitudes  
246 of wave I and V responses with all the cortical volumes and thickness of the ROIs in the  
247 brain (corrected by age, education, gender and audiogram thresholds). Non-significant  
248 differences were found when analyzing cortical volumes in all the ROIs between the two  
249 groups with different supra-threshold ABR amplitudes (data not shown). We found  
250 significant Spearman correlations between the amplitude of wave I and thickness of  
251 bilateral middle and inferior temporal cortex (Figure 4, Table 4). We also found significant  
252 correlations between wave I amplitude and right posterior cingulate and medial  
253 orbitofrontal cortices thickness, and for left inferior and transverse temporal cortices (Table  
254 4). Regarding wave V, we only found a significant correlation between left inferior and  
255 transverse temporal cortices.

256

## 257 **Discussion**

258 Here we give evidence that a reduced amplitude of suprathreshold auditory nerve  
259 responses (wave I) is associated with slower processing speed (TMT-A, digit symbol) and  
260 thinner bilateral temporal cortex in non-demented elderly humans. In addition, we show  
261 that the wave V/I ratio as a function of wave I amplitude yielded an asymmetric  
262 distribution, suggesting a midbrain compensatory gain increase for reduced suprathreshold  
263 auditory nerve responses.

#### 264 *Aging, audiogram thresholds and suprathreshold ABRs*

265 Although, in our data we did not find any significant correlation between the  
266 suprathreshold amplitudes of waves I and V with age (Figure 1), these results should be  
267 taken carefully, as the range of age of our subjects was between 65 and 85 years, and  
268 probably if we extend the range of age to younger subjects, it is very likely that we would

269 find significant age effects. Indeed, previous studies performed in animals [33,34] as well  
270 as in humans [35-37] found significant reductions in wave I amplitudes with age.

271 In our study we also found that the amplitudes of suprathreshold ABR responses  
272 were not associated with audiogram thresholds (PTA calculated between 0.5 and 4 kHz),  
273 suggesting that auditory thresholds and suprathreshold functions are independent measures  
274 of auditory processing. In this line, we previously showed that a deteriorated hearing  
275 threshold function as evidenced by a reduced number of DPOAE is associated with atrophy  
276 of the anterior cingulate cortex and executive dysfunction in presbycusis [9]. In contrast,  
277 here we show that a reduced amplitude of suprathreshold auditory nerve responses is not  
278 associated with deteriorated executive function, but with slower processing speed (longer  
279 TMT-A latencies and worse digit symbol scores) and thinner temporal cortex. These  
280 findings suggest that the impairment of different auditory functions (threshold and  
281 suprathreshold) could affect different brain structures and cognitive domains.

#### 282 *Midbrain gain increase*

283 We found an increased wave V/I ratio in the group with reduced suprathreshold  
284 auditory nerve responses ( $<0.15 \mu\text{V}$ ), which was independent of age and hearing  
285 thresholds. The gain increase of midbrain responses is also supported by the fact that the  
286 amplitudes of wave V responses were similar between the two groups with different wave I  
287 amplitudes (Table 2). Thus, the preserved amplitude of suprathreshold wave V responses in  
288 the group with reduced wave I could be reflecting a compensatory gain increase in the  
289 midbrain. A similar mechanism has been proposed for peripheral de-afferentation [16,38].  
290 Moreover, animal models have shown that cochlear de-afferentation is sufficient for  
291 inducing an increase in the spontaneous activity of auditory cortex neurons [39], showing  
292 that the effects of peripheral de-afferentation can also affect cortical processing. Here we  
293 show in humans, that the group with reduced auditory nerve amplitudes has structural brain  
294 changes that were located bilaterally in the middle and inferior temporal cortex, and in the  
295 posterior cingulate cortex of the right hemisphere.

#### 296 *Brain atrophy in presbycusis*

297 Previous studies have related audiogram threshold loss with right temporal and  
298 cingulate cortex atrophy [9-12,40,41]. Here we extended these results, showing that in  
299 addition to audiogram threshold elevation, reduced suprathreshold amplitudes of auditory  
300 nerve responses are associated to a reduction of the thickness of bilateral middle and  
301 inferior temporal cortices, and right posterior cingulate cortex. Importantly, in the present  
302 study, we showed significant reductions in the cortical thickness, but not in the cortical  
303 volume of these regions. These results suggest that the cortical thickness is a more sensitive  
304 measure than cortical volume loss for evidencing brain atrophy related to suprathreshold  
305 auditory impairments. In addition, our data show that these structural brain changes can be  
306 present in earlier stages of presbycusis, or even in subjects with normal hearing (at least as  
307 evaluated by audiogram thresholds between 0.5 and 4 kHz).

308 In a previous work [9], we demonstrated that reduced PCC thickness was correlated  
309 with worse auditory thresholds in patients with presbycusis and cochlear dysfunction,  
310 suggesting that the atrophy of the right PCC is related to hearing loss. Here, we showed  
311 that a reduction in the cortical thickness of the right PCC is also associated with  
312 suprathreshold hearing impairments, suggesting that PCC atrophy is related to hearing  
313 threshold and suprathreshold impairments. The right posterior cingulate cortex is important  
314 for visuospatial abilities like orientation and spatial navigation. Interestingly the PCC is  
315 among the earliest regions that get atrophied in prodromal and preclinical Alzheimer's  
316 disease [42]. In this line, the right PCC might be an important brain region linking hearing  
317 impairments with cognitive decline in presbycusis.

#### 318 *Processing speed and suprathreshold auditory-nerve function*

319 Previous evidence has shown that worse audiogram thresholds [10,43] or an  
320 alteration of the cochlear function as evidenced by loss of DPOAE [9] are associated with  
321 executive dysfunction, memory loss and global cognitive decline. In addition to these  
322 associations, here we show that reduced suprathreshold auditory-nerve responses are  
323 associated to slower processing speed, as evidenced by TMT-A responses (Figure 3, Table  
324 3) and digit symbol performance (Table 3), cognitive tests which do not rely on auditory  
325 inputs. Processing speed tests are usually categorized as “fluid cognition” and are  
326 influenced by the aging process, but also by sensory impairments [44]. One speculative

327 explanation for the association between reduced amplitude of auditory-nerve responses and  
328 slower processing speed could be related to the physiological aging process, resulting in  
329 loss of synapses at different levels of the nervous system [45]. In this sense, we can propose  
330 that due to the aging process, the loss of synapses between the inner hair cells and auditory  
331 nerve neurons would result in reduced amplitude of suprathreshold wave I responses [19],  
332 while reduced synapses at the central nervous system would lead to slower processing  
333 speed [45]. Although cochlear synaptopathy has been associated to loss of synapses due to  
334 acoustic trauma, it could also be an indirect measure of a general loss of synapses in the  
335 central nervous system, and therefore the greater the loss of synapses in different circuits of  
336 the nervous system, the slower is the processing speed. Another speculative explanation is  
337 that processing speed could be related to white matter microstructural changes in the  
338 peripheral and central auditory pathways, including the auditory nerve, as a reduced  
339 fractional anisotropy in diffusion tensor imaging has been demonstrated in diverse white  
340 matter tracts of patients with hearing loss [46].

#### 341 **Conclusion**

342 We conclude that a reduction of the suprathreshold amplitude of auditory nerve  
343 responses is related to slower processing speed and reduced cortical thickness in bilateral  
344 middle and inferior temporal cortices and in the right posterior cingulate cortex. Taken  
345 together, the present and our previous findings [9] suggest that thresholds and  
346 suprathreshold hearing impairments are associated with different types of cognitive  
347 functions and brain structural changes.

#### 348 **References**

- 349 1. Deal J A, Betz J, Yaffe K, Harris T, Purchase-Helzner E, Satterfield S, Pratt S, Govil N,  
350 Simonsick EM, Lin F R. Hearing Impairment and Incident Dementia and Cognitive  
351 Decline in Older Adults: The Health ABC Study. *The Journals of Gerontology Series*  
352 *A: Biological Sciences and Medical Sciences*. 2016; 72: glw069.  
353 <https://doi.org/10.1093/gerona/glw069>
- 354 2. Livingston G, Sommerlad A, Orgeta V, Costafreda SG, Huntley J, Ames D, Ballard C,  
355 Banerjee S, Burns A, Cohen-Mansfield J, Cooper C, Fox N, Gitlin LN, Howard R,  
356 Kales HC, Larson EB, Ritchie K, Rockwood K, Sampson EL, Samus Q, Schneider LS,

- 357 Selbæk G, Teri L, Mukadam N. Dementia prevention, intervention, and care. *Lancet*.  
358 2017; 390:2673-2734. doi: 10.1016/S0140-6736(17)31363-6.
- 359 3. Wei J, Hu Y, Zhang L, Hao Q, Yang R, Lu H, Zhang X, Chandrasekar EK. Hearing  
360 Impairment, Mild Cognitive Impairment, and Dementia: A Meta-Analysis of Cohort  
361 Studies. *Dement Geriatr Cogn Dis Extra*. 2017; 7:440-452. doi: 10.1159/000485178.
- 362 4. Yuan J, Sun Y, Sang S, Pham JH, Kong WJ. The risk of cognitive impairment  
363 associated with hearing function in older adults: a pooled analysis of data from eleven  
364 studies. *Sci Rep*. 2018; 8:2137. doi: 10.1038/s41598-018-20496-w.
- 365 5. Lin FR, Albert M. Hearing loss and dementia - who is listening? *Aging Ment Health*.  
366 2014; 18:671-3. doi: 10.1080/13607863.2014.915924.
- 367 6. Gates GA, Mills JH. Presbycusis. *The Lancet*. 2005; 366: 1111-1120.
- 368 7. Moreno-Gómez FN, Véliz G, Rojas M, Martínez C, Olmedo R, Panussis F, Dagnino-  
369 Subiabre A, Delgado C, Delano PH. Music Training and Education Slow the  
370 Deterioration of Music Perception Produced by Presbycusis in the Elderly. *Front Aging*  
371 *Neurosci*. 2017; 9:149. doi: 10.3389/fnagi.2017.00149.
- 372 8. Lin FR, Ferrucci L, Metter EJ, An Y, Zonderman AB, Resnick SM. Hearing loss and  
373 cognition in the Baltimore Longitudinal Study of Aging. *Neuropsychology*. 2011;  
374 25:763-70. doi: 10.1037/a0024238.
- 375 9. Belkhiria C, Vergara RC, San Martín S, Leiva A, Marcenaro B, Martinez M, Delgado  
376 C, Delano PH. Cingulate Cortex Atrophy Is Associated With Hearing Loss in  
377 Presbycusis With Cochlear Amplifier Dysfunction. *Front Aging Neurosci*. 2019; 11:97.  
378 doi: 10.3389/fnagi.2019.00097.
- 379 10. Lin FR, Ferrucci L, An Y, Goh JO, Doshi J, Metter EJ, Davatzikos C, Kraut MA,  
380 Resnick SM. Association of hearing impairment with brain volume changes in older  
381 adults. *Neuroimage*. 2014; 90:84-92. doi: 10.1016/j.neuroimage.2013.12.059
- 382 11. Peelle JE, Wingfield A. The Neural Consequences of Age-Related Hearing Loss.  
383 *Trends Neurosci*. 2016; 39: 486-497.
- 384 12. Ren F, Ma W, Li M, Sun H, Xin Q, Zong W, Chen W, Wang G, Gao F, Zhao B. Gray  
385 Matter Atrophy Is Associated With Cognitive Impairment in Patients With Presbycusis:  
386 A Comprehensive Morphometric Study. *Front Neurosci*. 2018; 12:744. doi:  
387 10.3389/fnins.2018.00744.

- 388 13. Frisina DR, Frisina RD. Speech recognition in noise and presbycusis: relations to  
389 possible neural mechanisms. *Hear Res.* 1997; 106:95-104.
- 390 14. Kujawa SG, Liberman MC. Adding insult to injury: cochlear nerve degeneration after  
391 "temporary" noise-induced hearing loss. *J Neurosci.* 2009; 29:14077-85. doi:  
392 10.1523/JNEUROSCI.2845-09.2009.
- 393 15. Liberman MC. HIDDEN HEARING LOSS. *Scientific American.* 2015; 313:48–53.
- 394 16. Schaette R, McAlpine D. Tinnitus with a normal audiogram: physiological evidence for  
395 hidden hearing loss and computational model. *J Neurosci.* 2011; 31:13452-7. doi:  
396 10.1523/JNEUROSCI.2156-11.2011.
- 397 17. Bharadwaj HM, Verhulst S, Shaheen L, Liberman MC, Shinn-Cunningham BG.  
398 Cochlear neuropathy and the coding of supra-threshold sound. *Front Syst Neurosci.*  
399 2014; 8:26. doi: 10.3389/fnsys.2014.00026.
- 400 18. Boero LE, Castagna VC, Di Guilmi MN, Goutman JD, Elgoyhen AB, Gómez-Casati  
401 ME. Enhancement of the Medial Olivocochlear System Prevents Hidden Hearing Loss.  
402 *J Neurosci.* 2018; 38:7440-7451. doi: 10.1523/JNEUROSCI.0363-18.2018.
- 403 19. Sergeyenko Y, Lall K, Liberman MC, Kujawa SG. Age-Related Cochlear  
404 Synaptopathy: An Early-Onset Contributor to Auditory Functional Decline. *J Neurosci.*  
405 2013; 33:13686-94. doi: 10.1523/JNEUROSCI.1783-13.2013.
- 406 20. Stamper GC, Johnson TA. Auditory function in normal-hearing, noise-exposed human  
407 ears. *Ear Hear.* 2015; 36:172-84. doi: 10.1097/AUD.000000000000107.
- 408 21. Parthasarathy A, Kujawa SG. Synaptopathy in the Aging Cochlea: Characterizing  
409 Early-Neural Deficits in Auditory Temporal Envelope Processing. *J Neurosci.* 2018;  
410 38:7108-7119. doi: 10.1523/JNEUROSCI.3240-17.2018.
- 411 22. Quiroga P, Albala C, Klaasen G. Validation of a screening test for age associated cog-  
412 nitive impairment in Chile. *Rev Med Chile.* 20014; 132:467-478.
- 413 23. Folstein MF, Folstein SE, McHugh PR. Mini-mental state. A practical method for  
414 grading the cognitive state of patients for the clinician. *J Psychiatr Res.* 1975; 12: 189-  
415 98.
- 416 24. Dubois B, Slachevsky A, Litvan I, Pillon B. The FAB: a Frontal Assessment Battery at  
417 bedside. *Neurology.* 2000; 55:1621-1626.
- 418 25. Army Individual Test Battery. Manual of Directions and Scoring. 1944. Washington.

- 419 26. Kaplan E. The Boston Naming Test. 1978. Philadelphia: Lea & Febiger
- 420 27. Rey A. Test de copie d'une figure complexe. 1959. Paris: Centre de Psychologie
- 421 Appliquée.
- 422 28. Grober E, Buschke H, Crystal H, Bang S, Dresner R. Screening for dementia by
- 423 memory testing. *Neurology*. 1988; 38: 900-900.
- 424 29. Delgado C, Muñoz-Neira C, Soto A, Martínez M, Henríquez F, Flores P, Slachevsky A.
- 425 Comparison of the Psychometric Properties of the "Word" and "Picture" Versions of
- 426 the Free and Cued Selective Reminding Test in a Spanish-Speaking Cohort of Patients
- 427 with Mild Alzheimer's Disease and Cognitively Healthy Controls. *Archives of Clinical*
- 428 *Neuropsychology*. 2016; 31:165-75. doi: 10.1093/arclin/acv107.
- 429 30. Fischl B, Dale AM. Measuring the thickness of the human cerebral cortex from
- 430 magnetic resonance images. *Proc Natl Acad Sci U S A*. 2000; 97: 11050-5.
- 431 31. Rigtgers SC, Bos D, Metselaar M, Roshchupkin, GV, Baatenburg de Jong, RJ, Ikram
- 432 MA, Vernooij MW, Goedegebure A. Hearing Impairment Is Associated with Smaller
- 433 Brain Volume in Aging. *Front Aging Neurosci*. 2017; 9: 2. doi:
- 434 10.3389/fnagi.2017.00002.
- 435 32. Peelle JE. Listening Effort: How the Cognitive Consequences of Acoustic Challenge
- 436 Are Reflected in Brain and Behavior. *Ear Hear*. 2018; 39:204-214. doi:
- 437 10.1097/AUD.0000000000000494.
- 438 33. Boettcher FA, Mills JH, Norton BL. Age-related changes in auditory evoked potentials
- 439 of gerbils. I. Response amplitudes. *Hear Res*. 1993; 71:137-145.
- 440 [https://doi.org/10.1016/0378-5955\(93\)90029-Z](https://doi.org/10.1016/0378-5955(93)90029-Z)
- 441 34. Torre P, Fowler CG. Age-related changes in auditory function of rhesus monkeys
- 442 (*Macaca mulatta*). *Hear Res*. 2000; 142:131-140.
- 443 35. Oku T, Hasegawa M. The influence of aging on auditory brainstem response and
- 444 electrocochleography in the elderly. *ORL J Otorhinolaryngol Relat Spec*. 1997; 59:141-
- 445 6.
- 446 36. Konrad-Martin D, Dille MF, McMillan G, Griest S, McDermott D, Fausti SA, Austin
- 447 DF. Age-related changes in the auditory brainstem response. *J Am Acad Audiol*. 2012;
- 448 23:18-75. doi:10.3766/jaaa.23.1.3
- 449 37. Johannesen PT, Buzo BC, Lopez-Poveda EA. Evidence for age-related cochlear

- 450       synaptopathy in humans unconnected to speech-in-noise intelligibility deficits. *Hear*  
451       *Res.* 2019; 374:35-48. doi: 10.1016/j.heares.2019.01.017.
- 452   38. Hesse LL, Bakay W, Ong HC, Anderson L, Ashmore J, McAlpine D, Linden J,  
453       Schaette R. Non-Monotonic Relation between Noise Exposure Severity and Neuronal  
454       Hyperactivity in the Auditory Midbrain. *Front Neurol.* 2016; 7:133. doi:  
455       10.3389/fneur.2016.00133.
- 456   39. Eggermont JJ, Kral A. Somatic memory and gain increase as preconditions for tinnitus:  
457       Insights from congenital deafness. *Hear Res.* 2016; 333:37-48. doi:  
458       10.1016/j.heares.2015.12.018.
- 459   40. Cardin V. Effects of Aging and Adult-Onset Hearing Loss on Cortical Auditory  
460       Regions. *Front Neurosci.* 2016; 10:199. doi: 10.3389/fnins.2016.00199.
- 461   41. Mudar RA, Husain FT. Neural Alterations in Acquired Age-Related Hearing Loss.  
462       *Front Psychol.* 2016; 7:828. doi: 10.3389/fpsyg.2016.00828.
- 463   42. Coughlan G, Laczó J, Hort J, Minihane AM, Hornberger M. Spatial navigation deficits  
464       - overlooked cognitive marker for preclinical Alzheimer disease? *Nat Rev Neurol.*  
465       2018; 14:496-506. doi: 10.1038/s41582-018-0031-x.
- 466   43. Lin FR. Hearing loss and cognition among older adults in the United States. *J Gerontol*  
467       *A Biol Sci Med Sci.* 2011; 66:1131-6. doi: 10.1093/gerona/qlr115
- 468   44. Humes LE, Busey TA, Craig J, Kewley-Port D. Are age-related changes in cognitive  
469       function driven by age-related changes in sensory processing? *Atten Percept*  
470       *Psychophys.* 2013; 75:508-24. doi: 10.3758/s13414-012-0406-9.
- 471   45. Murman DL. The Impact of Age on Cognition. *Semin Hear.* 2015; 36:111-21. doi:  
472       10.1055/s-0035-1555115.
- 473   46. Husain FT, Medina RE, Davis CW, Szymko-Bennett Y, Simonyan K, Pajor NM,  
474       Horwitz B. Neuroanatomical changes due to hearing loss and chronic tinnitus: a  
475       combined VBM and DTI study. *Brain Res.* 2011; 1369:74-88. doi:  
476       10.1016/j.brainres.2010.10.095.
- 477  
478  
479  
480



481

482

483

484

485

486

| ANDES cohort                           | Female<br>(n=64) | Male<br>(n=37) | Total<br>(n=101) | p value |
|----------------------------------------|------------------|----------------|------------------|---------|
| Age (years)                            | 72.6 ± 5.2       | 75.1 ± 5.0     | 73.5 ± 5.2       | p=0.018 |
| Education (years)                      | 9.6 ± 4.5        | 9.3 ± 3.7      | 9.5 ± 4.2        | n.s.    |
| Hearing Thresholds<br>(dB, better ear) | 23.3 ± 11.5      | 29.1 ± 12.2    | 25.5 ± 12.0      | p=0.018 |
| MMSE (score)                           | 28.2 ± 0.9       | 27.8 ± 1.7     | 28.0 ± 1.3       | n.s.    |
| HHIE-S (score)                         | 7.8 ± 8.5        | 6.6 ± 8.6      | 7.4 ± 8.6        | n.s.    |

487

488 **Table 1. Summary of demographic data of the subjects considered in this report**  
489 **(obtained from ANDES cohort, n=101).** Significant gender differences were obtained for  
490 age and hearing thresholds, as men are older and have worse hearing thresholds than  
491 women (p<0.05, Mann Whitney). MMSE: Mini Mental State Examination, HHIE-S:  
492 Hearing Handicap Inventory for the Elderly, ns: non-significant.

493

494

495

496

497

498

499

500

501

502

503

504

| ANDES cohort<br>(n=101)            | Auditory nerve<br>less than<br>0.15 $\mu$ V ABR wave I<br>(n=68) | Auditory nerve<br>more than<br>0.15 $\mu$ V ABR wave I<br>(n=33) | p value<br>ANCOVA |
|------------------------------------|------------------------------------------------------------------|------------------------------------------------------------------|-------------------|
| Age                                | 74.0 $\pm$ 5.3                                                   | 72.6 $\pm$ 4.9                                                   | n.s.              |
| Years of education                 | 9.7 $\pm$ 4.3                                                    | 9.0 $\pm$ 4.1                                                    | n.s.              |
| PTA 0.5-4 kHz<br>(dB)              | 26.8 $\pm$ 13.3                                                  | 23.1 $\pm$ 8.5                                                   | n.s.              |
| DPOAE (n, both<br>ears)            | 7.0 $\pm$ 5.8                                                    | 7.8 $\pm$ 5.1                                                    | n.s.              |
| ABR wave V<br>amplitude ( $\mu$ V) | 0.349 $\pm$ 0.132                                                | 0.410 $\pm$ 0.115                                                | n.s.              |
| Wave V/I ratio                     | 5.64 $\pm$ 4.32                                                  | 2.15 $\pm$ 0.73                                                  | p<0.001*          |
| MMSE                               | 27.82 $\pm$ 1.40                                                 | 28.42 $\pm$ 1.30                                                 | n.s.              |
| TMT-A (s)                          | 66.3 $\pm$ 31.5                                                  | 51.9 $\pm$ 23.0                                                  | p=0.005*          |
| TMT-B (s)                          | 172.4 $\pm$ 84.0                                                 | 176.8 $\pm$ 91.1                                                 | n.s.              |
| Digit symbol                       | 36.3 $\pm$ 14.7                                                  | 40.5 $\pm$ 13.1                                                  | n.s.              |
| Fluency P                          | 10.0 $\pm$ 4.8                                                   | 10.1 $\pm$ 4.3                                                   | n.s.              |
| Perseverative errors<br>(WCS)      | 11.1 $\pm$ 9.1                                                   | 10.2 $\pm$ 6.3                                                   | n.s.              |
| Boston nomination                  | 24.4 $\pm$ 3.2                                                   | 25.0 $\pm$ 3.4                                                   | n.s.              |
| Rey Figure                         | 30.0 $\pm$ 5.4                                                   | 29.4 $\pm$ 5.1                                                   | n.s.              |

|                   |            |            |     |
|-------------------|------------|------------|-----|
| FAB               | 13.3 ± 2.5 | 14.0 ± 2.0 | n.s |
| FCRST free recall | 25.9 ± 7.9 | 26.2 ± 7.0 | n.s |

505

506 **Table 2. Demographic and neuropsychological variables compared according to the**  
 507 **two groups with different amplitude of auditory nerve responses.** ANCOVA was  
 508 corrected by age, gender, education and audiogram thresholds. Note that TMT-A time is the  
 509 only significant difference in cognitive performance between the groups ( $p < 0.05^*$ , adjusted  
 510 by Bonferroni for multiple comparisons).

511

| ANDES cohort<br>(n=101) | ABR wave<br>I amplitude               | ABR wave V<br>amplitude | ABR wave I<br>latency | ABR wave V<br>latency               |
|-------------------------|---------------------------------------|-------------------------|-----------------------|-------------------------------------|
| TMT-A                   | <b>rho= -0.272</b><br><b>p= 0.007</b> | rho= -0.065<br>p= 0.524 | rho=0.065<br>p=0.544  | rho=0.119<br>p=0.243                |
| Digit symbol            | <b>rho=0.199</b><br><b>p=0.049</b>    | rho=0.178<br>p=0.079    | rho=-0.079<br>p=0.461 | rho=-0.121<br>p=0.234               |
| Fluency P               | rho=-0.071<br>p=0.485                 | rho=-0.072<br>p=0.479   | rho=0.045<br>p=0.677  | rho=-0.119<br>p=0.243               |
| Perseverative<br>errors | rho=-0.024<br>p=0.817                 | rho=-0.066<br>p=0.516   | rho=-0.051<br>p=0.634 | rho=0.135<br>p=0.186                |
| Boston<br>nomination    | rho=0.068<br>p=0.504                  | rho=0.161<br>p=0.114    | rho=-0.097<br>p=0.363 | <b>rho=-0.208</b><br><b>p=0.039</b> |
| Rey Figure              | rho=-0.009<br>p=0.929                 | rho=-0.110<br>p=0.285   | rho=0.038<br>p=0.724  | rho=-0.117<br>p=0.256               |
| FAB                     | rho=0.041<br>p=0.692                  | rho=0.015<br>p=0.882    | rho=0.084<br>p=0.436  | rho=-0.062<br>p=0.542               |
| FCSRT free<br>recall    | rho=-0.10<br>p=0.327                  | rho=-0.120<br>p=0.238   | rho=-0.094<br>p=0.382 | rho=0.160<br>p=0.876                |

512

513 **Table 3. Partial correlations between ABR amplitudes and latencies and**  
 514 **neuropsychological tests in the ANDES cohort (n=101).** All correlations were adjusted  
 515 by age, education, gender and audiogram thresholds. Notice significant correlations (shown

516 in bold) between TMT-A time and digit symbol with the amplitude of ABR wave I. In  
 517 addition, Boston was significantly correlated with the latency of wave V.

518

519

520

521

522

523

| <b>Right hemisphere</b> | <b>Wave I</b>               | <b>Wave V</b>              |
|-------------------------|-----------------------------|----------------------------|
| Inferior temporal       | <b>rho=0.240; p=0.018*</b>  | rho=0.064; p=0.536         |
| Middle temporal         | <b>rho=0.221; p=0.029*</b>  | rho=0.107; p=0.298         |
| Superior temporal       | rho=0.157; p=0.124          | rho=0.195; p=0.056         |
| Transverse temporal     | rho=0.129; p=0.207          | rho=0.193; p=0.058         |
| Superior parietal       | rho=0.132; p=0.198          | rho=0.130; p=0.203         |
| Lateral orbitofrontal   | rho=0.093; p=.366           | rho=-0.014; p=0.894        |
| Medial orbitofrontal    | <b>rho=0.232; p=0.022*</b>  | rho=0.053; p=0.603         |
| Anterior cingulate      | rho=-0.027; p=0.793         | rho=-0.036; p=0.730        |
| Posterior cingulate     | <b>rho=0.214; p=0.036*</b>  | rho=-0.034; p=0.743        |
| Precentral thickness    | rho=0.154; p=0.133          | rho=-0.009; p=0.930        |
| Postcentral thickness   | rho=0.047; p=0.648          | rho=0.052; p=0.610         |
| <b>Left hemisphere</b>  | <b>Wave I</b>               | <b>Wave V</b>              |
| Inferior temporal       | <b>rho=0.216; p=0.034*</b>  | <b>rho=0.232; p=0.022*</b> |
| Middle temporal         | <b>rho=0.263; p=0.009**</b> | rho=0.111; p=0.280         |
| Superior temporal       | rho=0.198; p=0.052          | rho=0.066; p=0.524         |
| Transverse temporal     | <b>rho=0.215; p=0.034*</b>  | <b>rho=0.214; p=0.035*</b> |
| Superior parietal       | <b>rho=0.265; p=0.009**</b> | rho=0.136; p=0.183         |
| Lateral orbitofrontal   | rho=0.170; p=0.097          | rho=0.021; p=0.835         |

|                       |                          |                           |
|-----------------------|--------------------------|---------------------------|
| Medial orbitofrontal  | $\rho=0.099$ ; $p=0.337$ | $\rho=-0.059$ ; $p=0.568$ |
| Anterior cingulate    | $\rho=0.068$ ; $p=0.507$ | $\rho=0.199$ ; $p=0.051$  |
| Posterior cingulate   | $\rho=0.006$ ; $p=0.954$ | $\rho=-0.007$ ; $p=0.945$ |
| Precentral thickness  | $\rho=0.161$ ; $p=0.116$ | $\rho=-0.007$ ; $p=0.946$ |
| Postcentral thickness | $\rho=0.053$ ; $p=0.604$ | $\rho=-0.009$ ; $p=0.928$ |

524

525 **Table 4. Partial correlations between ABR amplitudes and cortical thickness in**  
526 **presbycusis patients from the ANDES cohort (n=101).** All correlations were controlled  
527 by age, education, gender and audiogram thresholds. Significant correlations are  
528 highlighted in bold font (\* $p<0.05$ ; \*\* $p<0,01$ ).

529

530 **Figure 1. Correlations between audiogram thresholds, age, education and supra-**  
531 **thresholds ABR responses.** A. Age and PTA were significantly correlated (Spearman,  
532  $\rho=0.326$ ,  $p=0.001$ ). B. and E. Scatter plots showing no correlations between the  
533 amplitude of wave I with age (in the range between 65 and 85 years) and audiogram  
534 thresholds. C. and F. Scatter plots showing no correlations between the amplitude of wave  
535 V with age (in the range between 65 and 85 years) and audiogram thresholds. D.  
536 Audiogram thresholds were not correlated with the years of education.

537

538 **Figure 2. Correlations between the amplitude and ratio of suprathreshold ABR**  
539 **responses.** A. The amplitude of wave I was significantly correlated with the amplitude of  
540 wave V ( $\rho=0.323$ ,  $p=0.001$ ). B. Wave ABR V/I amplitude ratio plotted as a function of  
541 wave I amplitude. Notice an asymmetric distribution of wave V/I ratio as a function of  
542 wave I amplitude, showing larger wave V/I ratios for wave I amplitudes smaller than 0.15  
543  $\mu\text{V}$ .

544

545 **Figure 3. Correlations between TMT-A performance and supra-threshold ABR**  
546 **responses.** (A) Trail-Making Test A speed is associated with the suprathreshold amplitude

547 of wave I amplitude ( $\rho=-0.272$ ,  $p=0.007$ ), but not with (B) the suprathreshold amplitude  
548 of wave V.

549

550 **Figure 4. The thickness of bilateral middle and inferior temporal cortex is correlated**  
551 **with the amplitude of ABR wave I responses.** (A) Right ( $\rho=0.221$ ;  $p=0.029$ ) and (B)  
552 left ( $\rho=0.263$ ;  $p=0.009$ ) middle temporal thickness correlated with wave I amplitude. (C)  
553 Right ( $\rho=0.240$ ;  $p=0.018$ ) and (D) left ( $\rho=0.216$ ;  $p=0.034$ ) inferior temporal cortex  
554 thickness correlated with wave I amplitude.

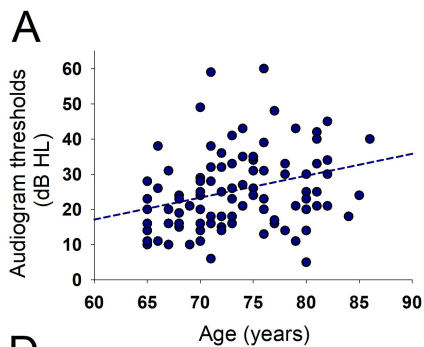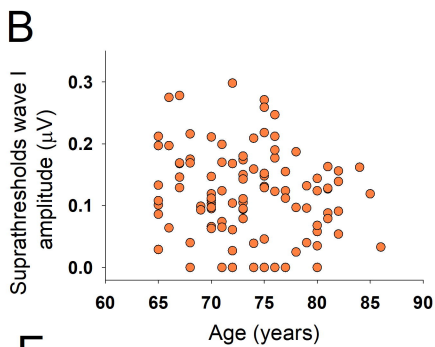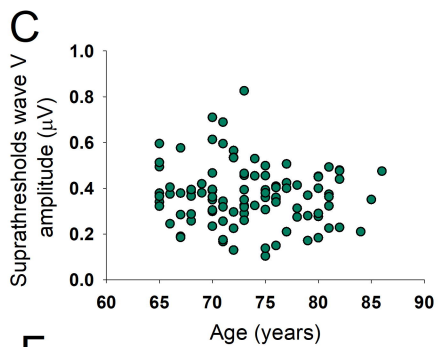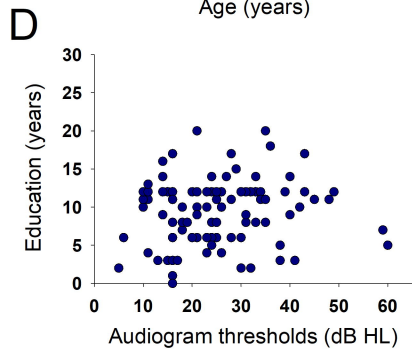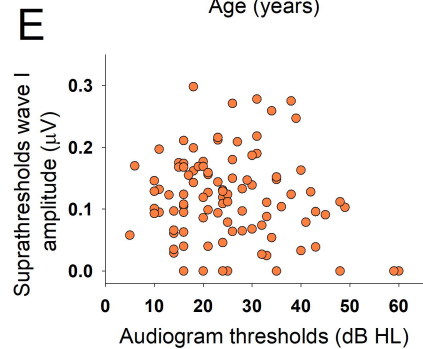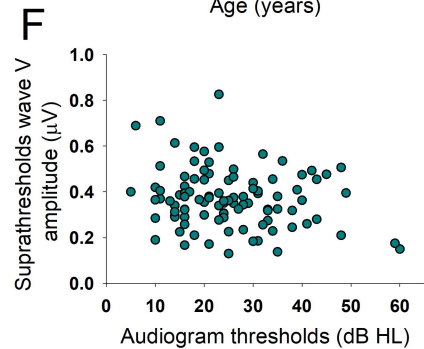

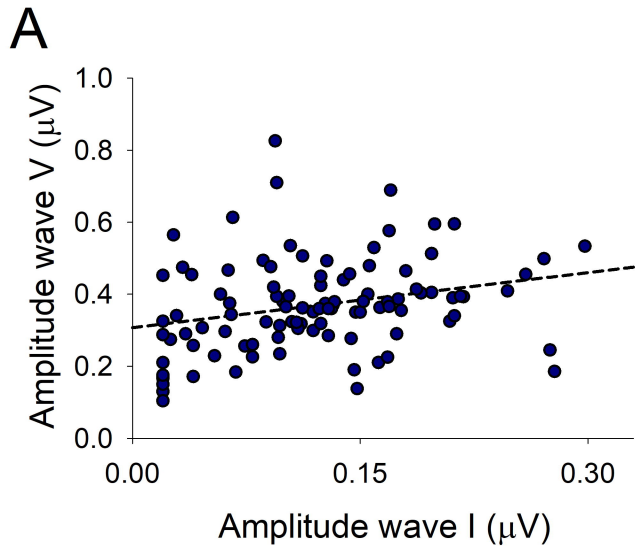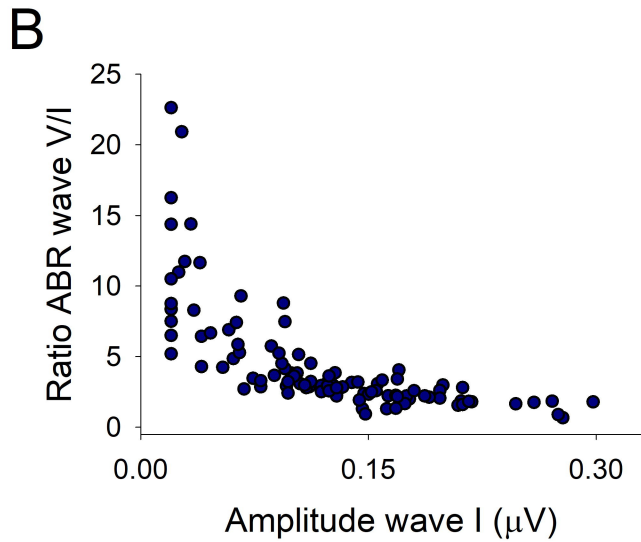



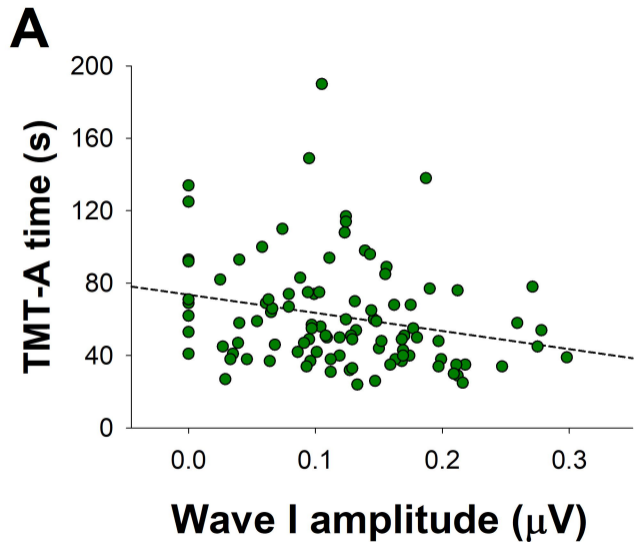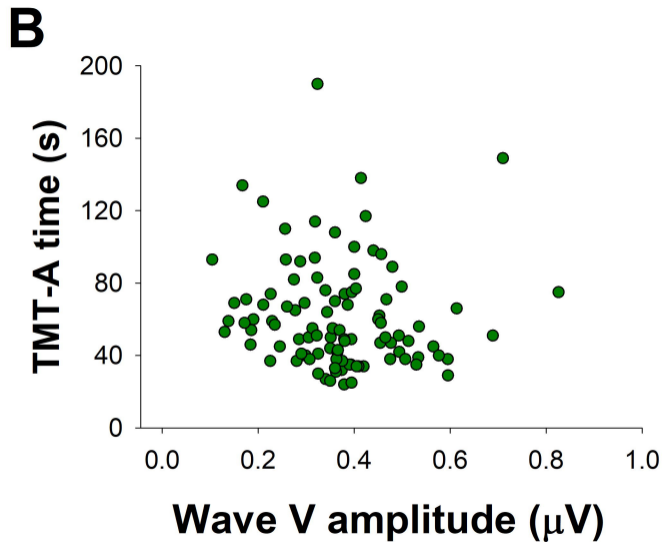

**A**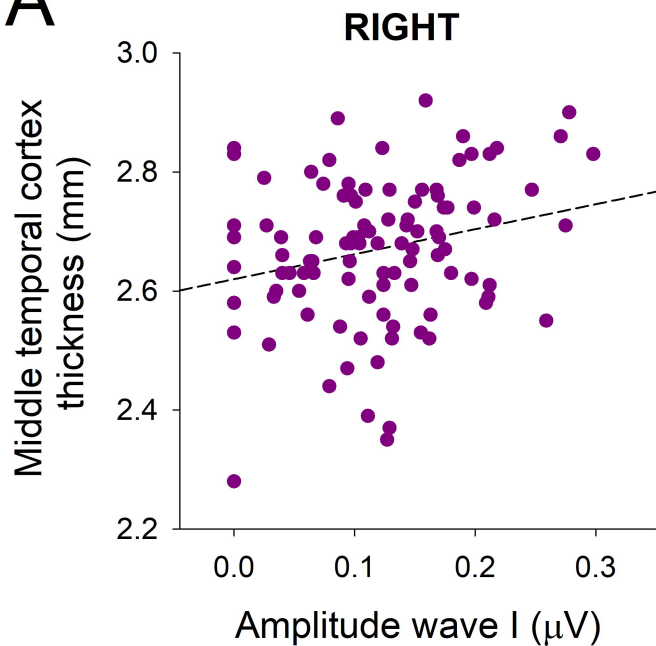**B**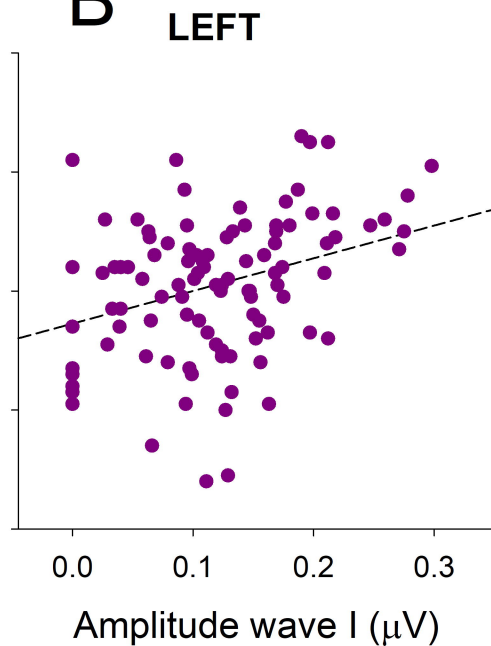**C**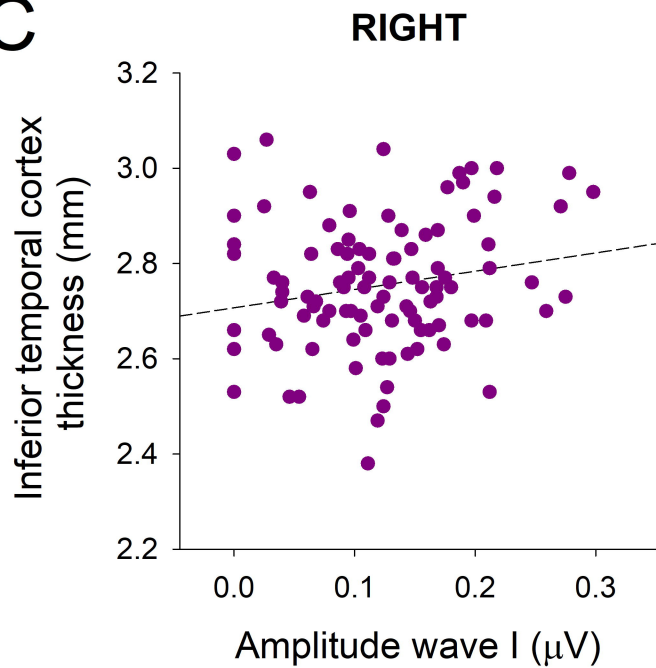**D**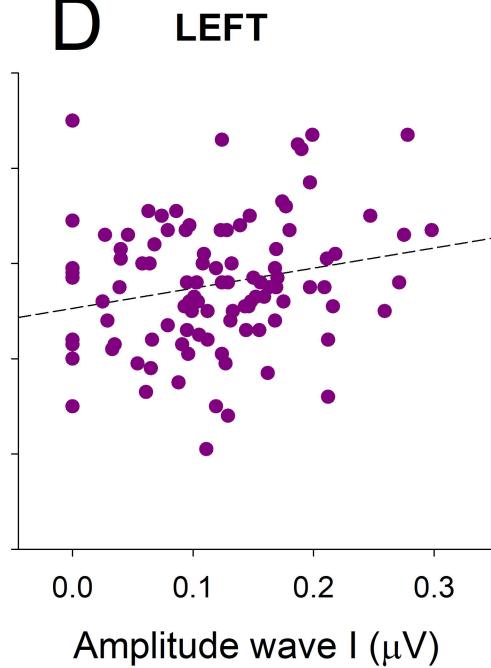

Source: https://www.biorxiv.org/content/10.1101/2020.02.12.945337v1.full.pdf
